# Supplementary material for: Preclinical characterization of an intravenous coronavirus 3CL protease inhibitor for the potential treatment of COVID19
Source: PubMed Central journal article supplement (PMC8523698; doi:10.1038/s41467-021-26239-2), 2021-10-18
Supplement: 41467_2021_26239_MOESM1_ESM.pdf [file 41467_2021_26239_MOESM1_ESM.pdf]

## Title: **Preclinical Characterization of an Intravenous Coronavirus 3CL Protease Inhibitor for the Potential Treatment of COVID19**

**Authors:** Britton Boras<sup>1,†</sup>, Rhys M. Jones<sup>1,†,\*</sup>, Brandon J. Anson<sup>2</sup>, Dan Arenson<sup>3</sup>, Lisa Aschenbrenner<sup>3</sup>, Malina A. Bakowski<sup>4</sup>, Nathan Beutler<sup>5</sup>, Joseph Binder<sup>1</sup>, Emily Chen<sup>4</sup>, Heather Eng<sup>3</sup>, Holly Hammond<sup>6</sup>, Jennifer Hammond<sup>7</sup>, Robert E. Haupt<sup>6</sup>, Robert Hoffman<sup>1</sup>, Eugene P. Kadar<sup>3</sup>, Rob Kania<sup>1</sup>, Emi Kimoto<sup>3</sup>, Melanie G. Kirkpatrick<sup>4</sup>, Lorraine Lanyon<sup>3</sup>, Emma K. Lendy<sup>8</sup>, Jonathan R. Lillis<sup>9</sup>, James Logue<sup>6</sup>, Suman A. Luthra<sup>10</sup>, Chunlong Ma<sup>11</sup>, Stephen W. Mason<sup>12,3</sup>, Marisa E. McGrath<sup>6</sup>, Stephen Noell<sup>3</sup>, R. Scott Obach<sup>3</sup>, Matthew N. O’ Brien<sup>13</sup>, Rebecca O’Connor<sup>3</sup>, Kevin Ogilvie<sup>3</sup>, Dafydd Owen<sup>10</sup>, Martin Pettersson<sup>10</sup>, Matthew R Reese<sup>3</sup>, Thomas F. Rogers<sup>5,14</sup>, Romel Rosales<sup>15,16</sup>, Michelle I. Rossulek<sup>10</sup>, Jean G. Sathish<sup>12</sup>, Norimitsu Shirai<sup>3</sup>, Claire Stepan<sup>3</sup>, Martyn Ticehurst<sup>9</sup>, Lawrence W. Updyke<sup>10</sup>, Stuart Weston<sup>6</sup>, Yuao Zhu<sup>12</sup>, Kris M. White<sup>15,16</sup>, Adolfo García-Sastre<sup>15,16</sup>, Jun Wang<sup>11</sup>, Arnab K. Chatterjee<sup>4</sup>, Andrew D. Mesecar<sup>2,8</sup>, Matthew B. Frieman<sup>6</sup>, Annaliesa S. Anderson<sup>12</sup>, Charlotte Allerton<sup>10</sup>

### **Affiliations:**

<sup>1</sup>Worldwide Research and Development, Pfizer Inc., La Jolla, CA 92121,

<sup>2</sup>Department of Biological Sciences, Purdue University, West Lafayette, IN, 47907 USA.

<sup>3</sup>Worldwide Research and Development, Pfizer Inc., Groton, CT 06340 USA

<sup>4</sup>Calibr, a division of The Scripps Research Institute, La Jolla, CA 92037 USA

<sup>5</sup>Department of Immunology and Microbiology, The Scripps Research Institute, La Jolla, CA 92037

<sup>6</sup>Department of Microbiology and Immunology University of Maryland School of Medicine, Baltimore, MD 21201

<sup>7</sup>Worldwide Research and Development, Pfizer Inc., Collegeville, PA 19426, USA

<sup>8</sup>Department of Biochemistry, Purdue University, West Lafayette, IN, 47907 USA

<sup>9</sup>Worldwide Research and Development, Pfizer Inc., Sandwich, CT13 9ND, UK

<sup>10</sup>Worldwide Research and Development, Pfizer Inc., Cambridge, MA 02139 USA

<sup>11</sup>Department of Pharmacology and Toxicology, College of Pharmacy, University of Arizona, Tucson, AZ, 85721

<sup>12</sup>Worldwide Research and Development, Pfizer Inc., Pearl River, NY 10965 USA

<sup>13</sup>Worldwide Research and Development, Pfizer Inc., Lake Forest, IL 60045 USA

<sup>14</sup>UC San Diego Division of Infectious Diseases and Global Public Health, UC San Diego School of Medicine, La Jolla, CA 92093.

<sup>15</sup>Department of Microbiology, Icahn School of Medicine at Mount Sinai, New York, NY, USA

<sup>16</sup>Global Health and Emerging Pathogens Institute, Icahn School of Medicine at Mount Sinai, New York, NY, USA

† These authors contributed equally to this work.

\* To whom correspondence should be addressed. Email: rhys.jones@pfizer.com

**This Supplement includes:**

Figures S1-S3

Tables S1-S12

References (1-7)

Physiologically-based pharmacokinetic (PBPK) modeling of PF-00835231

A commercially available dynamic PBPK model, Simcyp population-based simulator (version 18.2; Certara UK Limited, Simcyp Division, Sheffield, United Kingdom), was used in the present study<sup>1</sup>. Physicochemical and pharmacokinetic parameters of PF-00835231 for the PBPK models are summarized in Table S11. Since PF-07304814 (prodrug) was predicted to be converted to PF-00835231 rapidly and extensively *in vivo*, the simulation was performed assuming an intravenous infusion of PF-00835231 with the conversion efficiency of 75% from PF-07304814, which was predicted from animal data. For the prediction of DDIs of PF-00835231 with itraconazole, the vendor-verified compound files in Simcyp library were used, i.e., itraconazole (sv-itraconazole\_fed capsule) with competitive  $K_i = 0.0013 \mu\text{M}$  and itraconazole metabolite (sv-OH-itraconazole) with competitive  $K_i = 0.0023 \mu\text{M}$ .

Simulation of clinical trials was performed with a virtual population of healthy volunteers in 10 trials of 10 subjects (total 100 subjects), each aged 20 to 50 years with a female/male ratio of 0.5, whose CYP3A4 degradation rate constant ( $k_{deg}$ ) was  $0.019 \text{ h}^{-1}$  in liver and  $0.030 \text{ h}^{-1}$  in intestine. The output sampling interval in Simcyp simulation toolbox was set to 0.2 hours in all simulations. To predict DDIs of PF-00835231 with itraconazole, PF-00835231 at 320mg/day (equivalent to PF-00835231 formed following PF-07304814 ~500mg/day taking into account conversion and molecular weight differences) was administered IV for 10 days (days 5 to 15) to a virtual population with and without 15-day repeated oral administration of itraconazole 200mg once daily (days 1 to 15). Pharmacokinetic parameters such as maximal plasma concentration ( $C_{max}$ ), area under the plasma concentration time-curve from time zero to 24 hours post dose (AUC) and the ratios of  $C_{max}$  ( $C_{maxR}$ ) and AUC (AUCR) in treatment groups relative to control groups were obtained from Simcyp outputs.

The model-predicted  $C_{maxR}$  and AUCR for PF-00835231 were ~2x at the daily dose of 320mg/day (corresponding to ~500mg/day PF-07304814) (Table S12).

 $C_{eff}$  projection of protease inhibitor to the clinic

The inhibitory quotient (IQ) has been a useful metric for translating preclinical antiviral potencies to the clinic across a number of viral diseases as indicated in the FDA guidance<sup>2</sup>. IQ is defined as the human  $C_{min,u}$  unbound concentration divided by the *in vitro* unbound (serum adjusted)  $EC_{50,u}$  value in the antiviral assay (equation 13).

$$IQ = \frac{C_{min,u}}{EC_{50,u}} \quad (13)$$

Some antiviral therapies have shown significant benefit with IQ close to 1<sup>3</sup>; however, rapidly controlling viral replication frequently requires maintaining an exposure at least 10x higher than *in vitro* EC<sub>50</sub><sup>4</sup>. Clinically approved protease inhibitors have effectively decreased viral loads when dosed at IQ values from 1-100, when protein binding and site of action exposure are taken into account<sup>4</sup>. Importantly, antivirals in general and, specifically, protease inhibitors can potentially lead to increased mutations and additional drug resistance when dosed at an IQ less than 1<sup>5</sup>.

How high an IQ value is required depends on the steepness of the dose response curve. The hill coefficient (m), and the EC<sub>50</sub> are related to the *in vitro* antiviral activity at a range of concentrations (C) by equation 14:

$$\text{in vitro antiviral activity} = 100 * \frac{C^m}{EC_{50}^m + C^m} \quad (14)$$

PF-00835231 shows a high hill coefficient (m=3) across a range of *in vitro* antiviral assays, like those of clinical protease inhibitors targeting HIV and HCV<sup>6,7</sup>. There is only a 2- to 3-fold difference between the antiviral EC<sub>50</sub> and EC<sub>90</sub> concentrations (Fig. 2), rather than the typical 9-fold difference for antiviral agents with hill coefficients of 1. Therefore, relatively small ratios of exposure to EC<sub>50</sub> values (3-10) are related to near complete viral suppression.

## References

1. Jamei, M. *et al.* The Simcyp Population-based ADME Simulator. *Expert Opin. Drug Metab. Toxicol.* **5**, 211–223 (2009).
2. *Guidance for Industry Antiviral Product Development - Conducting and Submitting Virology Studies to the Agency.* <https://www.fda.gov/media/71223/download> (2006).
3. Mo, H. *et al.* Estimation of inhibitory quotient using a comparative equilibrium dialysis assay for prediction of viral response to hepatitis C virus inhibitors. *J. Viral Hepat.* **18**, 338–348 (2011).
4. Reddy, M. B. *et al.* Pharmacokinetic/Pharmacodynamic Predictors of Clinical Potency for Hepatitis C Virus Nonnucleoside Polymerase and Protease Inhibitors. *Antimicrob. Agents Chemother.* **56**, 3144–3156 (2012).

5. Duval, X. *et al.* Amprenavir Inhibitory Quotient and Virological Response in Human Immunodeficiency Virus-Infected Patients on an Amprenavir-Containing Salvage Regimen without or with Ritonavir. *Antimicrob. Agents Chemother.* **46**, 570–574 (2002).
6. Shen, L. *et al.* Dose-response curve slope sets class-specific limits on inhibitory potential of anti-HIV drugs. *Nat. Med.* **14**, 762–766 (2008).
7. Shen, L. *et al.* A Critical Subset Model Provides a Conceptual Basis for the High Antiviral Activity of Major HIV Drugs. *Sci. Transl. Med.* **3**, 91ra63-91ra63 (2011).

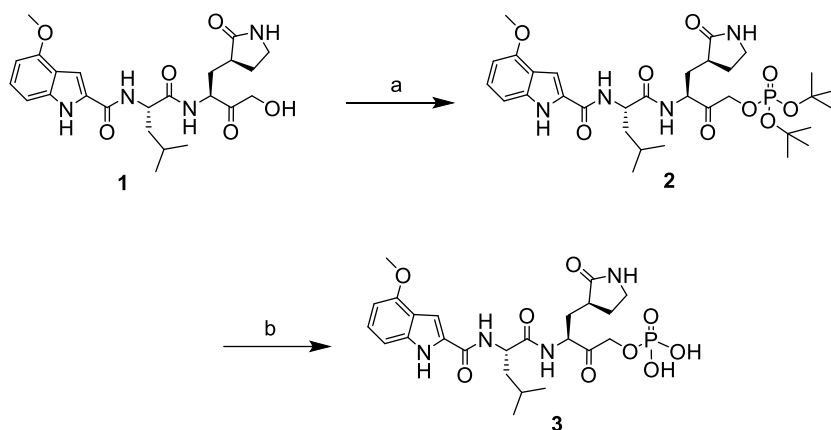

**Fig. S1. Synthesis of PF-07304814 and PF-00835231 with reagents and conditions.** a) Di-tert-butyl N,N-dipropylphosphoramidite, tetrazole, tetrahydrofuran, 0°C to room temp., then H<sub>2</sub>O<sub>2</sub>, 0°C, 91% over 2 steps; b) CF<sub>3</sub>COOH, CH<sub>2</sub>Cl<sub>2</sub>, 0°C, 54%.

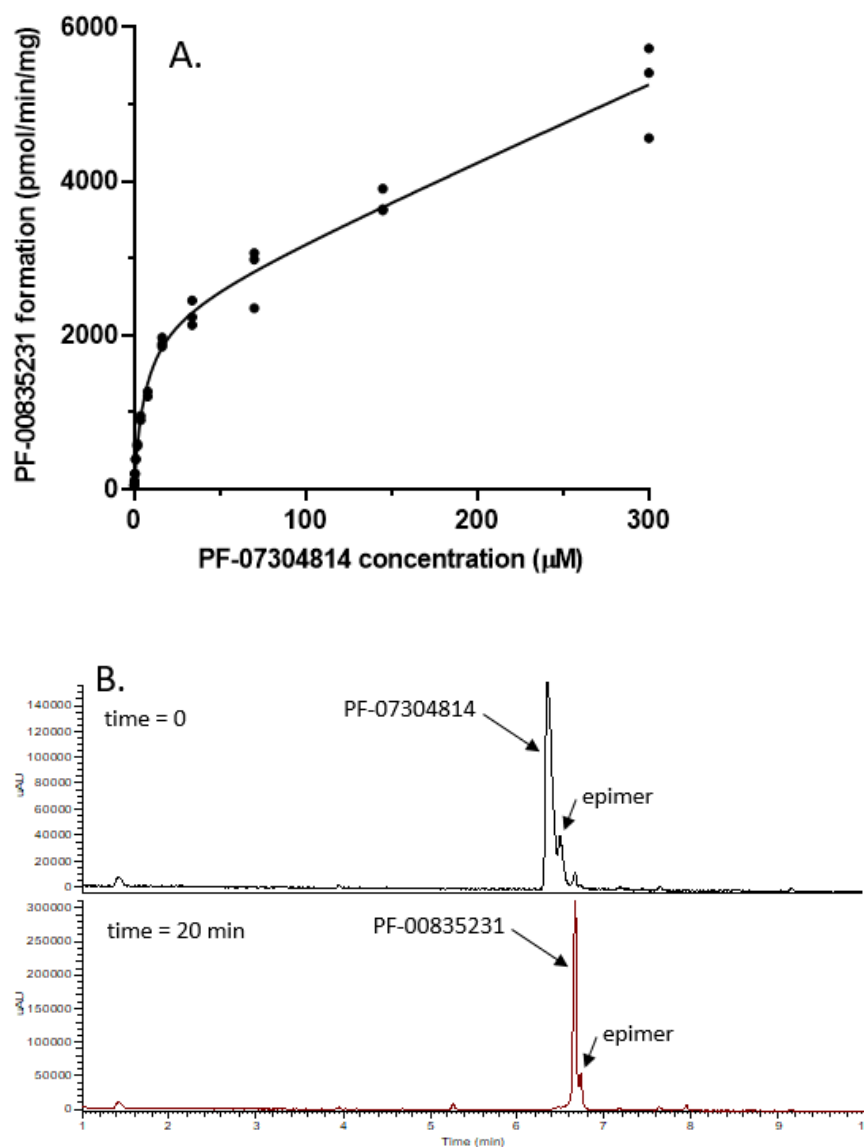

**Fig. S2. Metabolism of PF-07304814 in human liver S9** (A) Substrate saturation plot of the metabolism of phosphate prodrug PF-07304814 to the active drug PF-00835231 in human liver S9 fraction. (B) HPLC-UV chromatograms of extracts of an incubation of phosphate prodrug PF-07304814 (Rt 6.3 min) in human liver S9 demonstrating complete conversion to the active entity PF-00835231 (Rt 6.7 min).

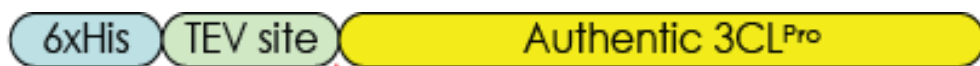

nsp5 cleavage site XSXLQ\*(A/S)XXX  
 TEV cleavage site ENLYFQ\*(G/S)XXX

**Fig. S3.** 3CL protease expression constructs and associated TEV and nsp5 cleavage sites.

Table S1. Summary of the In Vitro Antiviral Activity for PF-00835231 on Related Coronaviruses in Vero E6 cells with Efflux Inhibitor

| <b>Drug Treatment</b>    | <b>EC<sub>50</sub><br/>SARS-CoV-2<br/>μM ± Std. Dev</b> | <b>EC<sub>50</sub><br/>MERS<br/>μM ± Std. Dev</b> | <b>EC<sub>50</sub><br/>SARS-CoV<br/>μM ± Std. Dev</b> | <b>EC<sub>50</sub><br/>MA-15<br/>μM ± Std. Dev</b> |
|--------------------------|---------------------------------------------------------|---------------------------------------------------|-------------------------------------------------------|----------------------------------------------------|
| PF-00835231<br>+ 2 μM EI | 0.06 ± 0.03                                             | 0.04 ± 0.01                                       | 0.09 ± 0.04                                           | 0.08 ± 0.01                                        |

EI = efflux inhibitor (CP-00100356); Std. Dev. = standard deviation; N=3 for SARS-CoV-2 and MERS; N=2 for SARS-CoV and MA-15

**Table S2. Activity of PF-00835231 against human proteases and HIV protease.**

| <b>Protease</b>              | <b>IC<sub>50</sub> μM</b> |
|------------------------------|---------------------------|
| SAR-Cov-2 3CL <sup>pro</sup> | 0.0069                    |
| Human Cathepsin B            | 6.1                       |
| Human Elastase               | >33                       |
| Human Chymotrypsin           | >100                      |
| Human Thrombin               | >100                      |
| Human Caspase 2              | >33                       |
| Human Cathepsin D            | >11                       |
| HIV-1 protease               | >11                       |

**Table S3. Summary of the In Vitro Antiviral Activity, Cytotoxicity, and Therapeutic Index for PF-00835231 with and without P-gp Inhibitor**

| Virus Strain <sup>a</sup> | Host Cell | Compound                 | P-gp Inhibitor <sup>b</sup><br>( $\mu\text{M}$ ) | EC <sub>50</sub><br>( $\mu\text{M}$ ) | CC <sub>50</sub><br>( $\mu\text{M}$ ) | TI <sup>c</sup> |
|---------------------------|-----------|--------------------------|--------------------------------------------------|---------------------------------------|---------------------------------------|-----------------|
| SARS-CoV2                 | Vero      | CP-100356 <sup>d</sup>   | -                                                | 23.4                                  | 29.5                                  | 1.26            |
| SARS-CoV2                 | Vero      | PF-00835231 <sup>d</sup> | 0                                                | 35.9                                  | >50                                   | 1.39            |
| SARS-CoV2                 | Vero      | PF-00835231 <sup>e</sup> | 0.5                                              | 2.36                                  | >50                                   | 21.2            |
| SARS-CoV2                 | Vero      | PF-00835231 <sup>e</sup> | 1                                                | 0.95                                  | >50                                   | 52.6            |
| SARS-CoV2                 | Vero      | PF-00835231 <sup>d</sup> | 2                                                | 0.46                                  | >50                                   | 109             |

a. Data generated at Southern Research Institute (SRI) – 2020. SARS-CoV-2 Washington strain.

b. P-gp Inhibitor is CP-100356.

c. The TI was calculated by dividing the individual CC<sub>50</sub> by the EC<sub>50</sub> values and then calculating TI mean.

d. Values are averages based on an n=2 (EC<sub>50</sub>) and n=1 (CC<sub>50</sub>).

e. Values are the geometric means based on n=4 (EC<sub>50</sub>) and n=2 (CC<sub>50</sub>).

**Table S4. Evaluation of the fractional metabolism of PF-00835231 in human liver microsomes and recombinant CYP3A using selective CYP3A inhibitor ketoconazole.**

| Metabolite   | K <sub>M</sub> ( $\mu\text{M}$ ) | V <sub>max</sub><br>(pmol/min/mg) | CL <sub>int</sub><br>( $\mu\text{L}/\text{min}/\text{mg}$ ) | f <sub>CL</sub> | % Inhibition<br>by<br>ketoconazole | f <sub>m</sub><br>(CYP3A) |
|--------------|----------------------------------|-----------------------------------|-------------------------------------------------------------|-----------------|------------------------------------|---------------------------|
| Metabolite 1 | 124                              | 321                               | 2.6                                                         | 0.61            | 86                                 | 0.53                      |
| Metabolite 2 | 119                              | 91                                | 0.76                                                        | 0.18            | 90                                 | 0.16                      |
| Metabolite 3 | 120                              | 68                                | 0.57                                                        | 0.13            | 82                                 | 0.11                      |
| Metabolite 4 | 43                               | 12                                | 0.30                                                        | 0.07            | 82                                 | 0.06                      |
| <b>Sum</b>   |                                  |                                   | <b>4.2</b>                                                  |                 |                                    | <b>0.86</b>               |

CL<sub>int</sub> = Intrinsic clearance; CYP = Cytochrome P450; f<sub>CL</sub> = Fractional clearance; f<sub>m</sub> = Fraction metabolized; HLM = Human liver microsomes; K<sub>M</sub> = Concentration at 50% maximum velocity; rCYP = Recombinant human CYP; V<sub>max</sub> = Maximum initial velocity.

**Table S5. Reversible CYP inhibition by PF-07304814 or PF-00835231 in human liver microsomes using individual CYP substrates in the presence of NADPH.**

| CYP   | Enzyme Reaction                  | Zero-Minute Preincubation (T <sub>0</sub> ) <sup>a</sup> |                       | 30-Minute Preincubation (T <sub>30</sub> ) <sup>a</sup> |                       |
|-------|----------------------------------|----------------------------------------------------------|-----------------------|---------------------------------------------------------|-----------------------|
|       |                                  | PF-07304814                                              | PF-00835231           | PF-07304814                                             | PF-00835231           |
|       |                                  | IC <sub>50</sub> (μM)                                    | IC <sub>50</sub> (μM) | IC <sub>50</sub> (μM)                                   | IC <sub>50</sub> (μM) |
| 1A2   | Phenacetin O-dealkylation        | >100                                                     | >200                  | >100                                                    | >200                  |
| 2B6   | Bupropion hydroxylation          | ND                                                       | >200                  | ND                                                      | >200                  |
| 2C8   | Amodiaquine N-dealkylation       | >100                                                     | >200                  | >100                                                    | >200                  |
| 2C9   | Diclofenac 4'-hydroxylation      | >100                                                     | >200                  | >100                                                    | >200                  |
| 2C19  | S-Mephenytoin 4'-hydroxylation   | >100                                                     | >200                  | >100                                                    | >200                  |
| 2D6   | Dextromethorphan O-demethylation | >100                                                     | >200                  | >100                                                    | >200                  |
| 3A4/5 | Midazolam 1'-hydroxylation       | >100                                                     | >200                  | >100                                                    | >200                  |
| 3A4/5 | Testosterone 6β-hydroxylation    | ND                                                       | 108 (70-172)          | ND                                                      | 62.4 (41-98)          |

Confidence interval shown in parenthesis; CYP = Cytochrome P450; IC<sub>50</sub> = 50% inhibitory concentration; NADPH = Reduced form of nicotinamide adenine dinucleotide phosphate; NC = Not calculated; ND = Not determined, TDI = Time-dependent inhibition; T<sub>0</sub> = Time zero; T<sub>30</sub> = Time 30 minutes.

<sup>a</sup>Average data obtained from triplicate samples for each test article concentrations were used to calculate IC<sub>50</sub> values.



**Table S6. Time dependent CYP3A4/5 inhibition by PF-00835231 in human liver microsomes using individual CYP substrates.**

| <b>CYP</b> | <b>Probe Substrate<br/>(Concentration)</b> | <b><math>k_{inact} \pm SE</math><br/>(<math>\text{min}^{-1}</math>)</b> | <b><math>K_I \pm SE</math><br/>(<math>\mu\text{M}</math>)</b> | <b><math>k_{inact} / K_I</math><br/>(<math>\text{mL}/\mu\text{mol}/\text{min}</math>)</b> |
|------------|--------------------------------------------|-------------------------------------------------------------------------|---------------------------------------------------------------|-------------------------------------------------------------------------------------------|
| 3A4/5      | Midazolam (20 $\mu\text{M}$ )              | $0.0300 \pm 0.0020$                                                     | $163 \pm 31$                                                  | 0.184                                                                                     |
| 3A4/5      | Testosterone (386 $\mu\text{M}$ )          | $0.0434 \pm 0.0007$                                                     | $168 \pm 8$                                                   | 0.258                                                                                     |

CYP = Cytochrome P450; HLM = Human liver microsomes;  $K_I$  = Apparent inactivation constant at half-maximal rate of inactivation;  $k_{inact}$  = Maximal rate of enzyme inactivation;  $k_{inact}/K_I$  = Measure of inactivator efficiency; NADPH = Reduced form of nicotinamide adenine dinucleotide phosphate; SE = Standard error; TDI = Time-dependent inhibition.

**Table S7. *In vitro* transporter inhibition by PF-07304814 or PF-00835231 using probe substrates.**

| Transporter | Probe Substrate (Concentration)     | IC <sub>50</sub> (μM) |             |
|-------------|-------------------------------------|-----------------------|-------------|
|             |                                     | PF-07304814           | PF-00835231 |
| MDR1/P-gp   | N-methyl quinidine (0.2 μM)         | >300                  | 65.6        |
| BCRP        | Rosuvastatin (0.2 μM)               | 238                   | 19.5        |
| OATP1B1     | Rosuvastatin (0.5 μM)               | 134                   | 30.1        |
| OATP1B3     | Rosuvastatin (0.5 μM)               | 202                   | 51.6        |
| OCT1        | [ <sup>14</sup> C]Metformin (10 μM) | >300                  | 36.3        |
| OAT1        | [ <sup>3</sup> H]PAH (0.5 μM)       | >300                  | >300        |
| OAT3        | [ <sup>3</sup> H]ES (0.1 μM)        | >300                  | >300        |
| OCT2        | [ <sup>14</sup> C]Metformin (20 μM) | >300                  | >300        |
| MATE1       | [ <sup>14</sup> C]Metformin (20 μM) | >300                  | 175.1       |
| MATE2K      | [ <sup>14</sup> C]Metformin (20 μM) | >300                  | 179.8       |

BCRP = Breast cancer resistance protein; BSEP = Bile salt export pump; OAT = Organic anion transporter; OATP = Organic anion-transporting polypeptide; OCT = Organic cation transporter; IC<sub>50</sub> = 50% inhibitory concentration; MATE = Multidrug and toxin extrusion protein; MDR = Multidrug resistance protein; PAH = P-aminohippuric acid; P-gp = P-glycoprotein.

**Table S8. Plasma protein binding of PF-07304814 or PF-00835231 in plasma, liver microsomes and S9.**

| Species | Matrix                          | Unbound fraction fu (%CV) |                           |
|---------|---------------------------------|---------------------------|---------------------------|
|         |                                 | PF-07304814 <sup>d</sup>  | PF-00835231               |
| Human   | Liver microsomes <sup>a,c</sup> | ND                        | 0.75 (8.7)                |
| Human   | Liver S9 <sup>b,c</sup>         | 0.890 (1.9)               | ND                        |
| Human   | Plasma                          | 0.184 (5.9)               | 0.449 (7.5)               |
| Monkey  | Plasma                          | 0.361 (10.2)              | 0.441 (7.7)               |
| Dog     | Plasma                          | 0.312 (10.9)              | 0.416 (9.5)               |
| Rat     | Plasma                          | 0.379 <sup>f</sup> (12.7) | 0.327 <sup>g</sup> (12.1) |

<sup>a</sup>measured at 0.8mg/mL protein, <sup>b</sup>measured at 0.03mg/mL protein, <sup>c</sup>2  $\mu$ M substrate concentration, <sup>d</sup>3.4  $\mu$ M substrate concentration, <sup>e</sup>5  $\mu$ M substrate concentration, <sup>f</sup>Sprague-Dawley rat plasma, <sup>g</sup>Wistar Hannover rat plasma

**Table S9. Preclinical plasma PK summary of PF-07304814 or PF-00835231 following oral and/or IV administration to rats, dogs and monkeys.**

| <b>Rat PK Data following IV or oral administration</b>          |                          |                          |
|-----------------------------------------------------------------|--------------------------|--------------------------|
| <b>PK parameter</b>                                             | <b>PF-07304814 (n=2)</b> | <b>PF-00835231 (n=3)</b> |
| Dose                                                            | 1.17mg/kg                | 2mg/kg (IV + PO)         |
| CL (mL/min/kg)                                                  | 194 (168-220)            | 27.0 ± 3.10              |
| Vdss (L/kg)                                                     | 0.58 (0.57-0.59)         | 0.75 ± 0.24              |
| Terminal T1/2 (h)                                               | 0.30 (0.36-0.23)         | 0.72 ± 0.12              |
| Oral F%                                                         | ND                       | 1.4 ± 0.76               |
| %unchanged in urine                                             | <0.1 (<0.1-<0.1)         | 7.8 ± 11.5               |
| PF-00835231 AUCinf (ng.h/mL)                                    | 424 (366-481)            | 1250 ± 146               |
| %Conversion to PF-00835231                                      | 68% (59-77)              | -                        |
|                                                                 |                          |                          |
| <b>Dog PK Data following IV administration (n=2)</b>            |                          |                          |
| <b>PK parameter</b>                                             | <b>PF-07304814</b>       | <b>PF-00835231</b>       |
| Dose (mg/kg)                                                    | 1.17mg/kg                | 1.0mg/kg (IV)            |
| CLp (mL/min/kg)                                                 | 517 (301-733)            | 18.2 (15.9-20.5)         |
| Vdss (L/kg)                                                     | 9.3 (5.8-12.9)           | 1.1 (0.9-1.2)            |
| Terminal T1/2 (h)                                               | 0.5 (0.3-0.7)            | 1.5 (1.4-1.6)            |
| %unchanged in urine                                             | <0.1 (<0.1-<0.1)         | 4.8 (1.6-8.0)            |
| PF-00835231 AUCinf (ng.h/mL)                                    | 753 (633-872)            | 932 (813-1050)           |
| %Conversion to PF-00835231                                      | 81% (78-83)              | -                        |
|                                                                 |                          |                          |
| <b>Monkey PK Data following IV or oral administration (n=2)</b> |                          |                          |
| <b>PK parameter</b>                                             | <b>PF-07304814</b>       | <b>PF-00835231</b>       |
| Dose (mg/kg)                                                    | 1.17mg/kg                | 1.0mg/kg (IV), 5mg/kg PO |
| Cl (mL/min/kg)                                                  | 191 (129-252)            | 28.7 (27.1-30.2)         |
| Vdss (L/kg)                                                     | 1.8 (0.91-2.6)           | 1.4 (1.3-1.5)            |
| Terminal T1/2 (h)                                               | 2.6 (2.2-3.0)            | 1.2 (1.1-1.3)            |
| Oral F%                                                         | ND                       | <0.1 (<0.1-<0.1)         |
| %unchanged in urine                                             | <0.1 (<0.1-<0.1)         | 0.9 (0.8-1.0)            |
| PF-00835231 AUCinf (ng.h/mL)                                    | 447 (304-589)            | 583 (614-552)            |
| %Conversion to PF-00835231                                      | 76% (55-96)              | -                        |

n=2 range shown in parenthesis, n=3 ± SD shown in parenthesis, ND = not determined

**Table S10. Predicted pharmacokinetic parameters of PF00835231 with and without coadministration of itraconazole.**

| PF-07304814 <sup>a</sup> | Itraconazole<br>mg/day | C <sub>max</sub> |            | AUC        |              | C <sub>max</sub> R | AUCR          |
|--------------------------|------------------------|------------------|------------|------------|--------------|--------------------|---------------|
|                          |                        | μM total         | μM unbound | μM·h total | μM·h unbound | ratio              | ratio         |
|                          | 500                    | 1.1              | 0.50       | 27         | 12           | -                  | -             |
|                          | 200                    | 2.4              | 1.1        | 58         | 26           | 2.2 (2.1-2.3)      | 2.1 (2.0-2.2) |

Data are expressed as geometric mean for C<sub>max</sub> and AUC and geometric mean with 90% confidence intervals in parentheses for C<sub>max</sub>R and AUCR.

<sup>a</sup> Daily dose of PF-07304814 provides formation of PF00835231 equivalent to 320mg/day used in the simulation.

**Table S11. Metabolic stability and enzyme kinetics of PF-07304814 in liver S9.**

| Kinetic Parameters                   | Kinetics                               |                                        |                                        |                                        |
|--------------------------------------|----------------------------------------|----------------------------------------|----------------------------------------|----------------------------------------|
|                                      | Rat                                    | Dog                                    | Monkey                                 | Human                                  |
| Model                                | Two Enzyme –<br>MM and<br>Unsaturation | Two Enzyme –<br>MM and<br>Unsaturation | Two Enzyme –<br>MM and<br>Unsaturation | Two Enzyme –<br>MM and<br>Unsaturation |
| K <sub>M</sub> (μM)                  | 53.4                                   | 2.91                                   | 8.10                                   | 6.23                                   |
| V <sub>max</sub><br>(pmol/min/mg)    | 2188                                   | 214                                    | 1186                                   | 2313                                   |
| CL <sub>int,2</sub><br>(μL/min/mg)   | 4.56                                   | 1.69                                   | 3.06                                   | 9.96                                   |
| CL <sub>int,app</sub><br>(μL/min/mg) | 45.5                                   | 75.2                                   | 150                                    | 381                                    |
| CL <sub>intu</sub><br>(μL/min/mg)    | 51                                     | 84                                     | 168                                    | 428                                    |

CL<sub>int,app</sub> = Apparent intrinsic clearance; CL<sub>int,2</sub> = Apparent intrinsic clearance of low affinity kinetic component; CL<sub>intu</sub> = unbound intrinsic clearance calculated by CL<sub>int</sub>/ fu inc. K<sub>M</sub> = Michaelis-Menten constant; MM = Michaelis-Menten; NADPH = β-Nicotinamide Adenine Dinucleotide Phosphate; S9 = Subcellular fraction; V<sub>max</sub> = Maximum enzyme velocity.

**Table S12. Physicochemical and pharmacokinetic parameters of PF00835231 for PBPK modeling.**

| Parameter (units)                            | Value   | Source                                          |
|----------------------------------------------|---------|-------------------------------------------------|
| Molecular weight                             | 472     | Calculated                                      |
| LogP                                         | 0.75    | Calculated                                      |
| pK <sub>a</sub>                              | neutral | Calculated                                      |
| Rbp                                          | 0.8     | Measured <i>in vitro</i>                        |
| f <sub>u,plasma</sub>                        | 0.449   | Measured <i>in vitro</i>                        |
| V <sub>ss</sub> (L/kg)                       | 1       | Predicted from animal data                      |
| Kp scalar                                    | 3.1     | Adjusted from the prediction (method 2)         |
| CL <sub>plasma</sub> (L/h)                   | 25      | Predicted from <i>in vitro</i> CL               |
| f <sub>m,CYP3A</sub>                         | 0.76    | Predicted from <i>in vitro</i> phenotyping data |
| rCL <sub>int,CYP3A4</sub> (μL/min/pmol P450) | 0.15    | Calculated by Simcyp (retrograde model)         |
| CL <sub>int,HLM</sub> (μL/min/mg protein)    | 6       | Calculated by Simcyp (retrograde model)         |
| CL <sub>renal</sub> (L/h)                    | 3       | Predicted from animal data                      |
| CYP3A4 K <sub>i</sub> (μM)                   | 108     | Measured <i>in vitro</i>                        |
| CYP3A4 K <sub>I</sub> (μM)                   | 163     | Measured <i>in vitro</i>                        |
| CYP3A4 k <sub>inact</sub> (h <sup>-1</sup> ) | 1.8     | Measured <i>in vitro</i>                        |
